# Supplementary material for: Discovery and Characterization of Phage Display-Derived Human Monoclonal Antibodies against RSV F Glycoprotein
Source: PubMed Central journal article supplement (PMC4892554; doi:10.1371/journal.pone.0156798), 2016-06-03
Supplement: pone.0156798.s001.pdf [file pone.0156798.s001.pdf]

**S1 Table. Amino acid sequences of variable regions of mAb 2E1 and 3B1**

|     | Heavy chain variable region                                                                                                         | Light chain variable region                                                                                           |
|-----|-------------------------------------------------------------------------------------------------------------------------------------|-----------------------------------------------------------------------------------------------------------------------|
| 2E1 | QVQLVESGGGLVQPGGSLRLSCAASGFTFSSYAITWVR<br>QAPGKGLEWVSNINSDGSSTYYADSVKGRFTISRDNK<br>NTLYLQMNSLRAEDTAVYYCARTTFFMGLYFDVWGQ<br>GTLVTVSS | DIELTQPPSVSVAPGQTARISCSGDNIGSTYAYWYQQKPG<br>QAPVLVIYDDTNRPSGIPERFSGSNSGNTATLTISGTQAED<br>EADYYCQTYDNQYLFGVFGGGTKLTVL  |
| 3B1 | QVQLVQSGAEVKKPGSSVKVSCASGGTFSDYYISWV<br>RQAPGQGLEWMGGIIPFGTANYAQKFQGRVTITADE<br>STSTAYMELSSLRSEDVAVYYCARKYPVNFGGFASWG<br>QGTLVTVSS  | DIVMTQSPLSLPVTGPESISCRSSQSLSSNGYTYLNWY<br>LQKPGQSPQLLIYLGSSRASGVPDRFSGSGSDFTLKISR<br>VEAEDVGVYYCQQYNNDPITFGQGTKVEIKRT |
